# Supplementary material for: Tea intake or consumption and the risk of dementia: a meta-analysis of prospective cohort studies
Source: PeerJ. 2023 Jul 18;11:e15688. doi: 10.7717/peerj.15688 (PMC10361076; doi:10.7717/peerj.15688)
Supplement: Supplemental Information 2 [file peerj-11-15688-s002.xlsx]

## Sheet: Sheet1
		All-cause dementia			AD			VD
Author	Year	RR	L_CI	U_CI	RR	L_CI	U_CI	RR	L_CI	U_CI
Hu et al.	2022	0.841	0.767	0.921	0.837	0.73	0.96	0.75	0.625	0.9	Overvall
Hu et al.	2022	0.777	0.686	0.88							Age＜65
Hu et al.	2022	0.919	0.803	1.052							Age＞65
Hu et al.	2022	0.886	0.776	1.01							Female
Hu et al.	2022	0.804	0.708	0.913							Male
Schaefer et al.	2022	1.23	1.15	1.32
Schaefer et al.	2022	1.31	1.21	1.43							Male
Zhang et al.	2021	0.89	0.82	0.98	0.89	0.78	1.02	0.75	0.63	0.89
Matsushita et al.	2021	0.68	0.48	0.96
Chuang et al.	2019	0.61	0.44	0.85							Age＞65
Fischer et al.	2018				0.94	0.86	1.02				Age＞65
Tomata et al.	2016	0.73	0.61	0.87							Age＞65
Shinohara et al.	2014	0.26	0.06	1.06							＞60	Green Tea
Eskelinen et al.	2009	0.4	0.24	0.69	0.36	0.15	0.86				Age＞65

## Sheet: Sheet2
All-cause dementia										metan lnrr lnse, label(namevar=author, yearvar=year) random xlabel(0.01, 1, 2) force									------------------------------------------------------------------------------
	Author	Year	RR	L_CI	U_CI	LnRR	Lnse			> eform texts(150)									Study omitted | Estimate [95% Conf. Interval]
	Hu et al.	2022	0.841	0.767	0.921	-0.173164	0.0466768												-------------------+----------------------------------------------------------
	Schaefer et al.	2022	1.23	1.15	1.32	0.207014	0.0351709			Heterogeneity chi-squared = 94.04 (d.f. = 7) p = 0.000									Hu et al. (2022) | .73852551 .57303089 .9518159
	Zhang et al.	2021	0.89	0.82	0.98	-0.116534	0.0454715			I-squared (variation in ES attributable to heterogeneity) = 92.6%									Schaefer et al. (2022)|.74313408 .64640135 .85434276
	Matsushita et al.	2021	0.68	0.48	0.96	-0.385662	0.176823			Estimate of between-study variance Tau-squared = 0.0628									Zhang et al. (2021)| .72515368 .55545098 .94670439
	Chuang et al.	2019	0.61	0.44	0.85	-0.494296	0.167975												Matsushita et al. (2021)|.77943242 .62694144 .96901381
	Tomata et al.	2016	0.73	0.61	0.87	-0.314711	0.09057			Test of ES=1 : z= 2.54 p = 0.011									Chuang et al. (2019)| .79358017 .64047486 .98328525
	Shinohara et al.	2014	0.26	0.06	1.06	-1.34707	0.732571												Tomata et al. (2016)| .77392602 .61927992 .96719021
	Eskelinen et al.	2009	0.4	0.24	0.69	-0.916291	0.269401			metaninf lnrr lnse, label(namevar=author, yearvar=year) random eform									Shinohara et al. (2014)|.7832672 .63805562 .96152663
																			Eskelinen et al. (2009)|.8155877 .6648683 1.0004739
All-cause dementia	Author	Year	RR	L_CI	U_CI	LnRR	Lnse	Subgroup		≥65 z= 2.95 p = 0.003									-------------------+----------------------------------------------------------
	Hu et al.	2022	0.919	0.803	1.052	-0.0844692	0.0689014	≥65		＜65 z= 3.97 p = 0.000									Combined | .76681797 .62451445 .94154716
	Chuang et al.	2019	0.61	0.44	0.85	-0.494296	0.167975	≥65
	Tomata et al.	2016	0.73	0.61	0.87	-0.314711	0.09057	≥65		metan lnrr lnse, label(namevar=author, yearvar=year) by(subgroup) random xlabel(0.01,									statistic freedom P I-squared** Tau-squared
	Shinohara et al.	2014	0.26	0.06	1.06	-1.34707	0.732571	≥65		> 1, 2) force nooverall eform texts(150)
	Eskelinen et al.	2009	0.4	0.24	0.69	-0.916291	0.269401	≥65											≥65 16.63 4 0.002 75.9% 0.0560
	Hu et al.	2022	0.777	0.686	0.88	-0.252315	0.0635317	＜65											＜65 0.00 0 . .% 0.0000
AD	Author	Year	RR	L_CI	U_CI	LnRR	Lnse	Subgroup		AD z= 2.26 p = 0.024
	Hu et al.	2022	0.837	0.73	0.96	-0.177931	0.0698696	AD		VD z= 4.50 p = 0.000									Heterogeneity degrees of
	Zhang et al.	2021	0.89	0.78	1.02	-0.116534	0.0684347	AD											statistic freedom P I-squared** Tau-squared
	Fischer et al.	2018	0.94	0.86	1.02	-0.0618754	0.0435269	AD
	Eskelinen et al.	2009	0.36	0.15	0.86	-1.02165	0.445484	AD		metan lnrr lnse, label(namevar=author, yearvar=year) by(subgroup) random xlabel(0.1,									AD 6.33 3 0.096 52.6% 0.0059
	Hu et al.	2022	0.75	0.625	0.9	-0.287682	0.0930212	VD		> 1, 2) force nooverall eform texts(150)									VD 0.00 1 1.000 0.0% 0.0000
	Zhang et al.	2021	0.75	0.63	0.89	-0.287682	0.0881382	VD

## Sheet: Sheet3
metan lnrr lnse, label(namevar=author, yearvar=year) random
Note: default data input format (theta, se_theta) assumed.
Tests for Publication Bias
Begg's Test
adj. Kendall's Score (P-Q) = 0
Std. Dev. of Score = 8.08
Number of Studies = 8
z = 0.00
Pr > |z| = 1.000
z = -0.12 (continuity corrected)
Pr > |z| = 1.000 (continuity corrected)
Egger's test
------------------------------------------------------------------------------
Std_Eff | Coef. Std. Err. t P>|t| [95% Conf. Interval]
-------------+----------------------------------------------------------------
slope | .1747386 .1059221 1.65 0.150 -.0844434 .4339205
bias | -3.953107 1.656255 -2.39 0.054 -8.005816 .0996025
------------------------------------------------------------------------------
